# Supplementary material
Source: publisher site journal article supplement (https://www.dovepress.com/article/346685)
Supplement: Supplementary file 1 [file get_supplementary_file.php]

# Supporting Information

## Hybrid cell membrane-functionalized biomimetic nanoparticles for targeted therapy of osteosarcoma

Jia-Xin Cai1,2,3,#, Ji-Hua Liu1,2,3,#, Jun-Yong Wu1,2,3, Yong-Jiang Li1,2,3, Xiao-Han Qiu1,2,3, Wen-Jie Xu1,2,3, Ping Xu1,2,*, Da-Xiong Xiang1,2,3,*

1 Department of Pharmacy, The Second Xiangya Hospital, Central South University, Changsha 410011, Hunan, People’s Republic of China；

2 Institute of Clinical Pharmacy, Central South University, Changsha 410011, Hunan, People’s Republic of China；

3 Hunan Provincial Engineering Research Center of Translational Medicine and Innovative Drug, Changsha, Hunan, People’s Republic of China

**#**These authors contributed equally to this work

*****Correspondence:

Ping Xu, Ph.D.

Department of Pharmacy, The Second Xiangya Hospital, Central South University, Changsha 410011, Hunan, People’s Republic of China

Email: xuping1109@csu.edu.cn

Da-Xiong Xiang, Ph.D.

Department of Pharmacy, The Second Xiangya Hospital, Central South University, Changsha 410011, Hunan, People’s Republic of China

Email: [xiangdaxiong@csu.edu.cn](mailto:xiangdaxiong@csu.edu.cn)

**Table S1.** Particle characterizations and drug loading properties of PLGA-PTX.

| **Sample** | **Particle size (nm)** | **Polydispersity Index** | **Zeta potential (mV)** | **Encapsulation Efficiency (%)** | **Drug Loading (%)** |
| --- | --- | --- | --- | --- | --- |
| PLGA | 132.73±0.61 | 0.093±0.03 | -24.60±1.32 | - | - |
| PLGA-PTX | 138.96±0.40 | 0.097±0.02 | -24.53±0.90 | 64.86±0.17 | 4.24±0.02 |

Data were presented as Mean ± SD.

**Table S2****.** The particle size and zeta potential of the membrane-coated nanoparticles.

| **Method** | **Sample** | **Particle size(nm)** | **Polydispersity Index** | **Zeta potential(mv)** |
| --- | --- | --- | --- | --- |
|  | PLGA NPs | 132.73±0.61 | 0.093±0.03 | -24.60±1.32 |
| Co-extusion | PLGA@143B NPs | 222.37±0.58 | 0.156±0.01 | -26.03±1.78 |
| PLGA@RAW NPs | 226.40±3.18 | 0.167±0.02 | -30.13±2.15 |
| PLGA@[143B-RAW] NPs | 249.17±6.16 | 0.179±0.01 | -30.67±1.56 |
| Ultrasonication | PLGA@143B NPs | 215.93±1.97 | 0.208±0.01 | -31.63±1.35 |
| PLGA@RAW NPs | 211.20±0.66 | 0.130±0.02 | -24.33±0.95 |
| PLGA@[143B-RAW] NPs | 221.33±3.33 | 0.170±0.02 | -34.13±2.24 |

Data were presented as Mean ± SD.


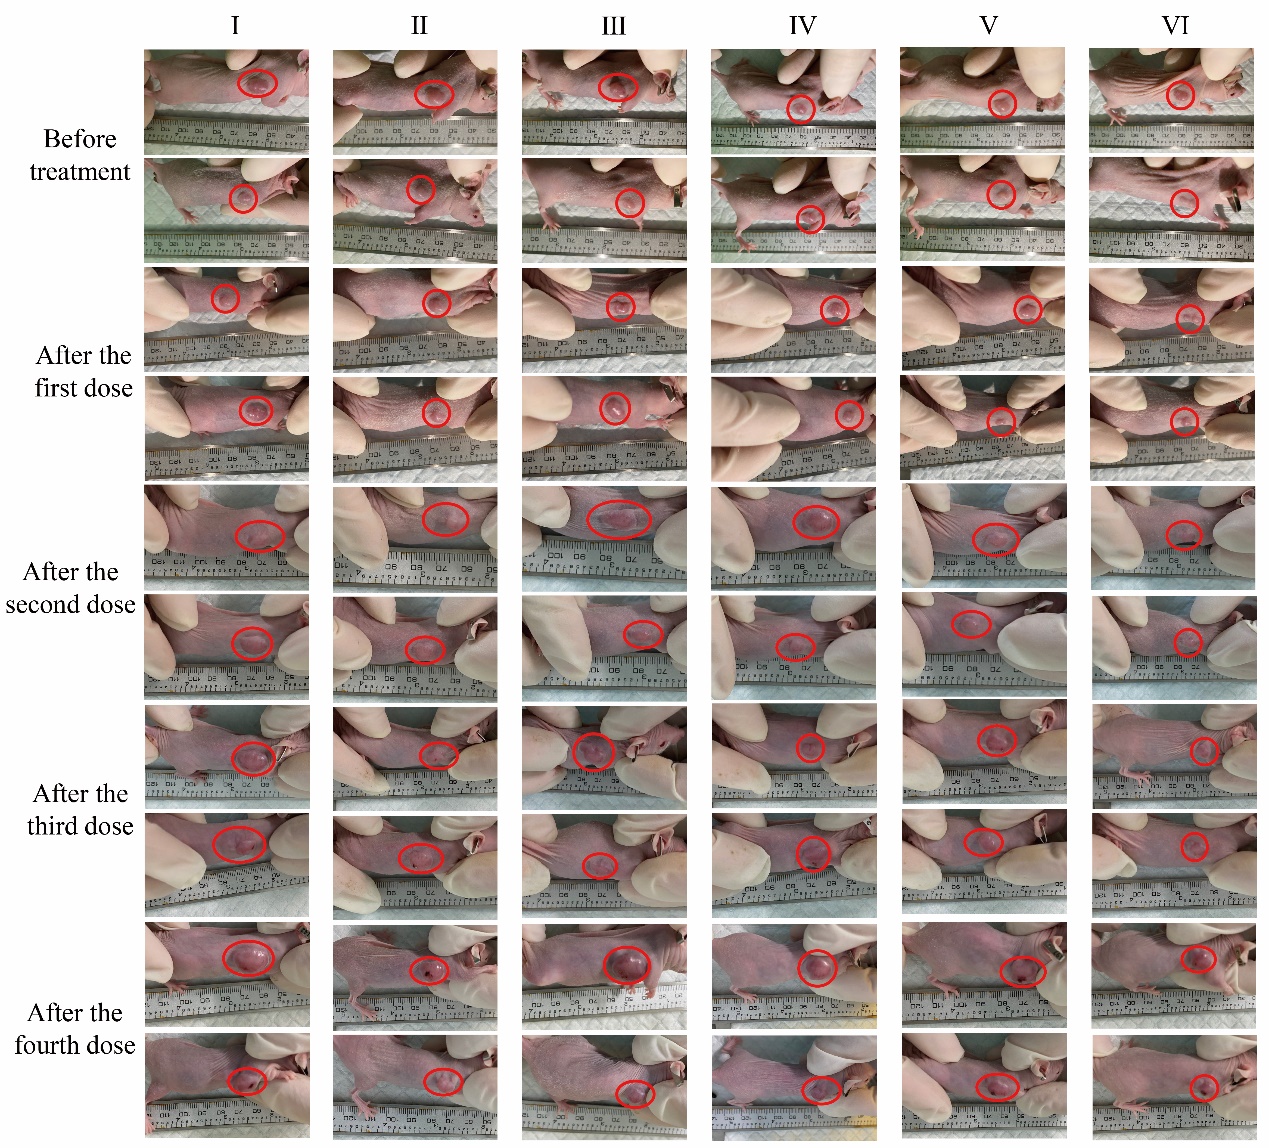


**Figure S1.** Representative photos of tumor-bearing mice before and after treatment. (Ⅰ) PBS; (Ⅱ) Free PTX; (Ⅲ) PLGA-PTX NPs; (Ⅳ) PTX-PLGA@RAW NPs; (Ⅴ) PTX-PLGA@143B NPs; (Ⅵ) PTX-PLGA@[143B-RAW] NPs.
